# Supplementary material
Source: publisher figshare collection journal article supplement (https://frontiersin.figshare.com/ndownloader/files/30699203)
Supplement: Supplementary file [file 30699203]

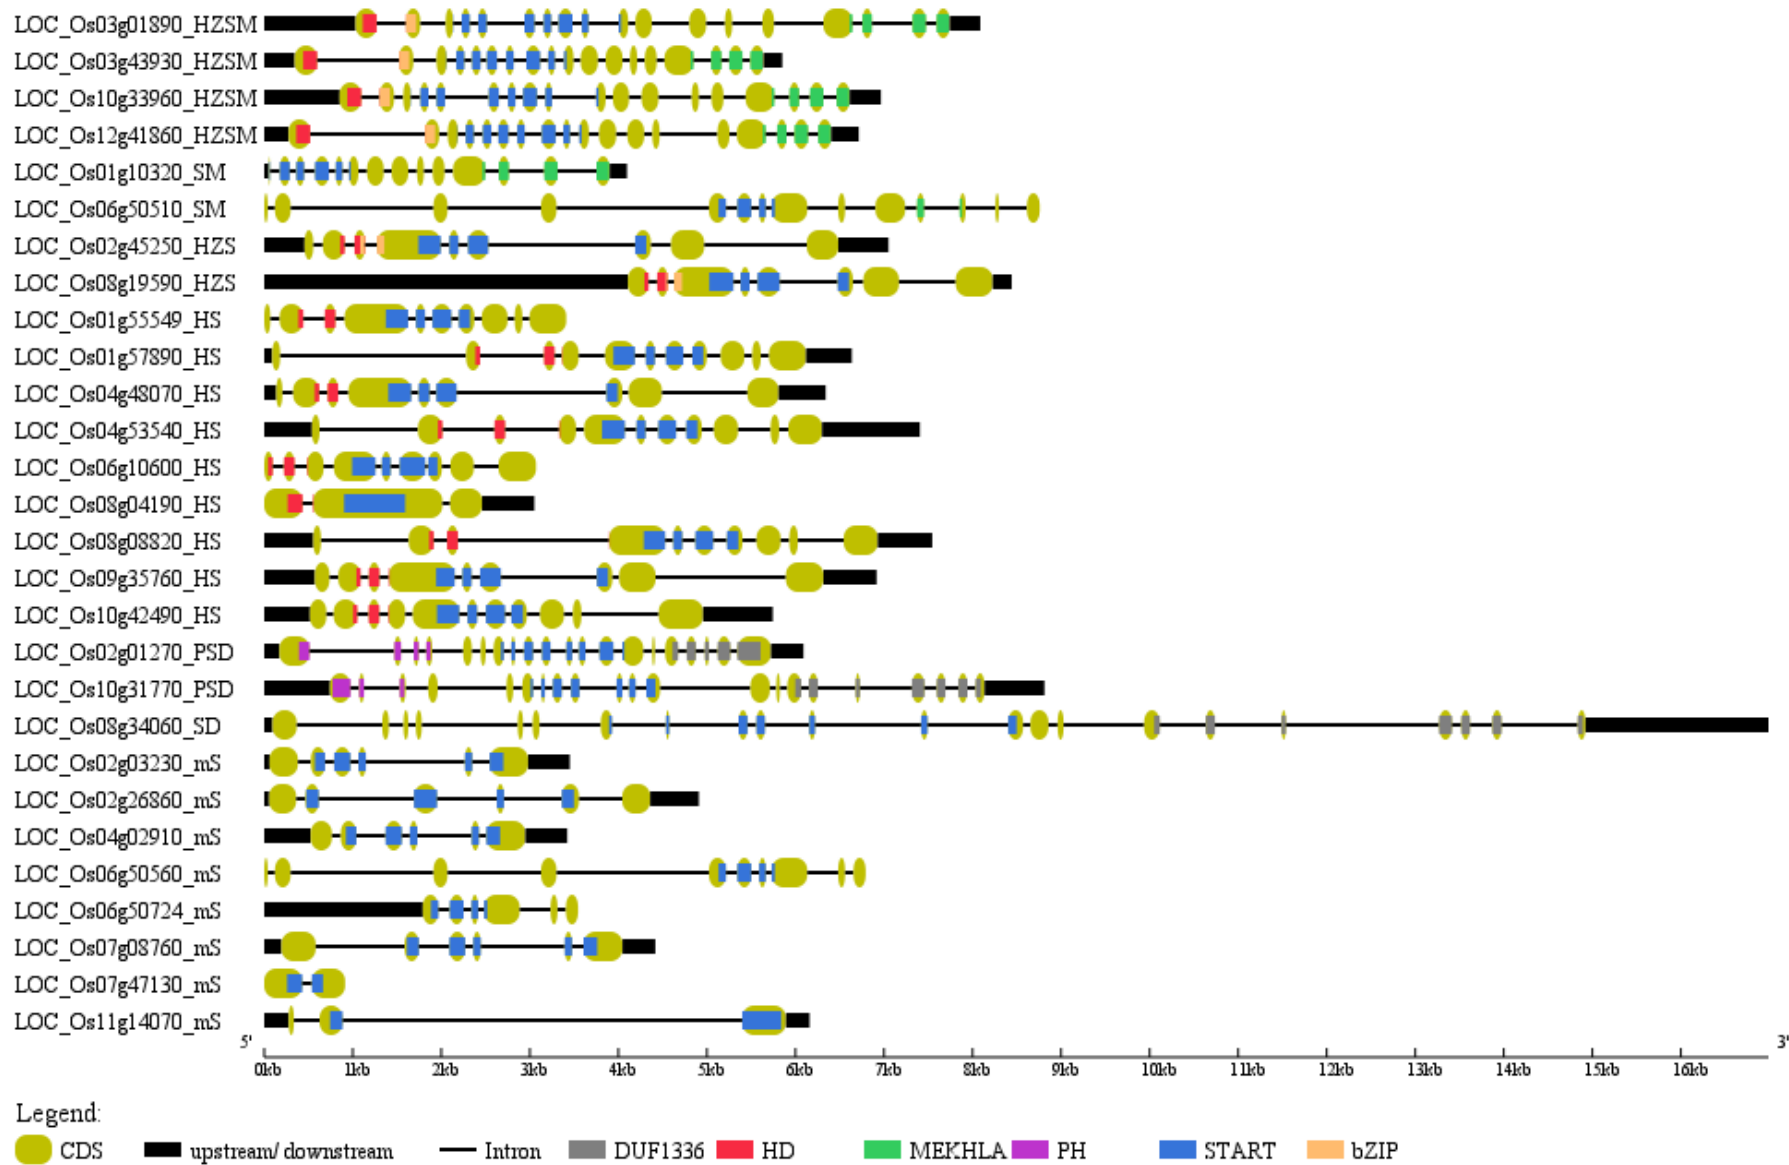

**Supplementary Figure 1A.** Gene structure analysis of the twenty-eight STARTs in *Oryza sativa* var. japonica: exon-intron patterns

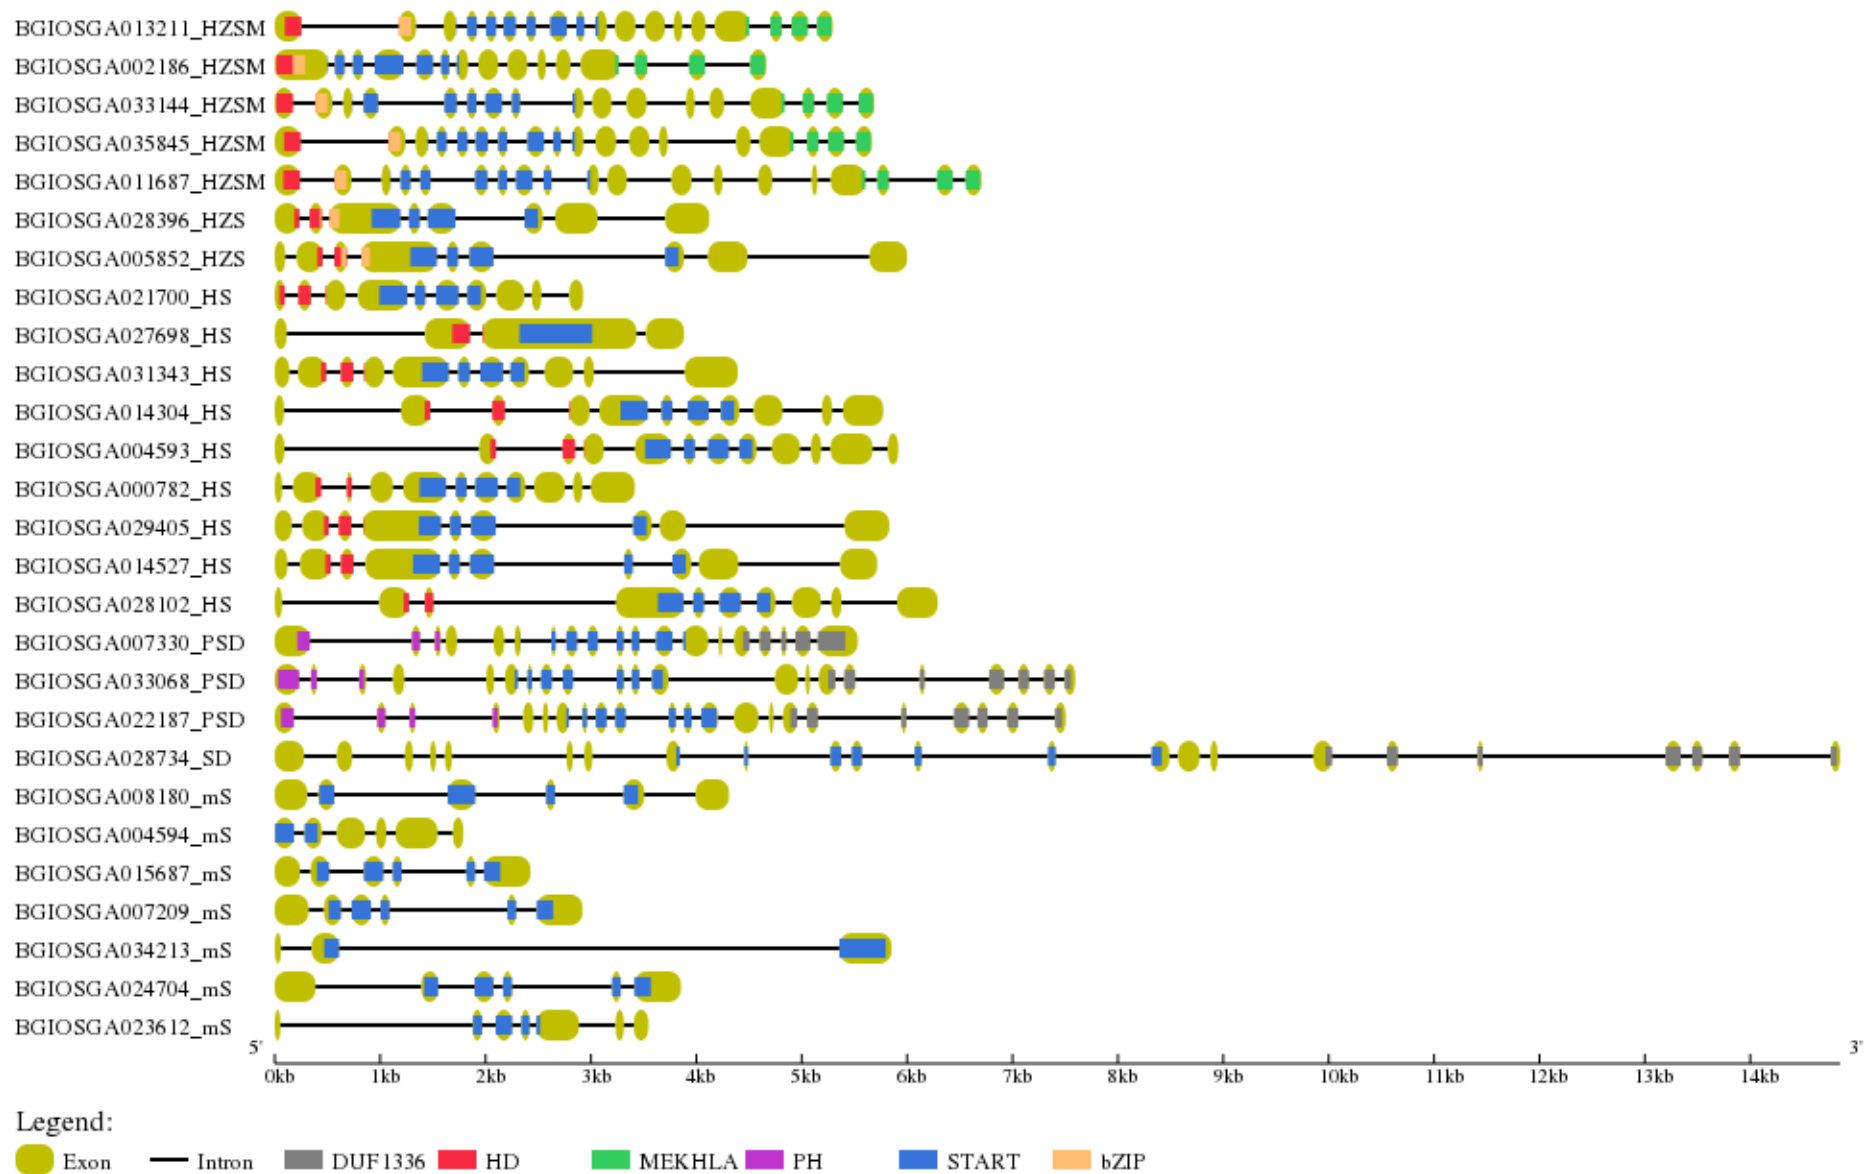

**Supplementary Figure 1B.** Gene structure analysis of the twenty-seven STARTs in *Oryza sativa* var. *indica*: exon-intron patterns

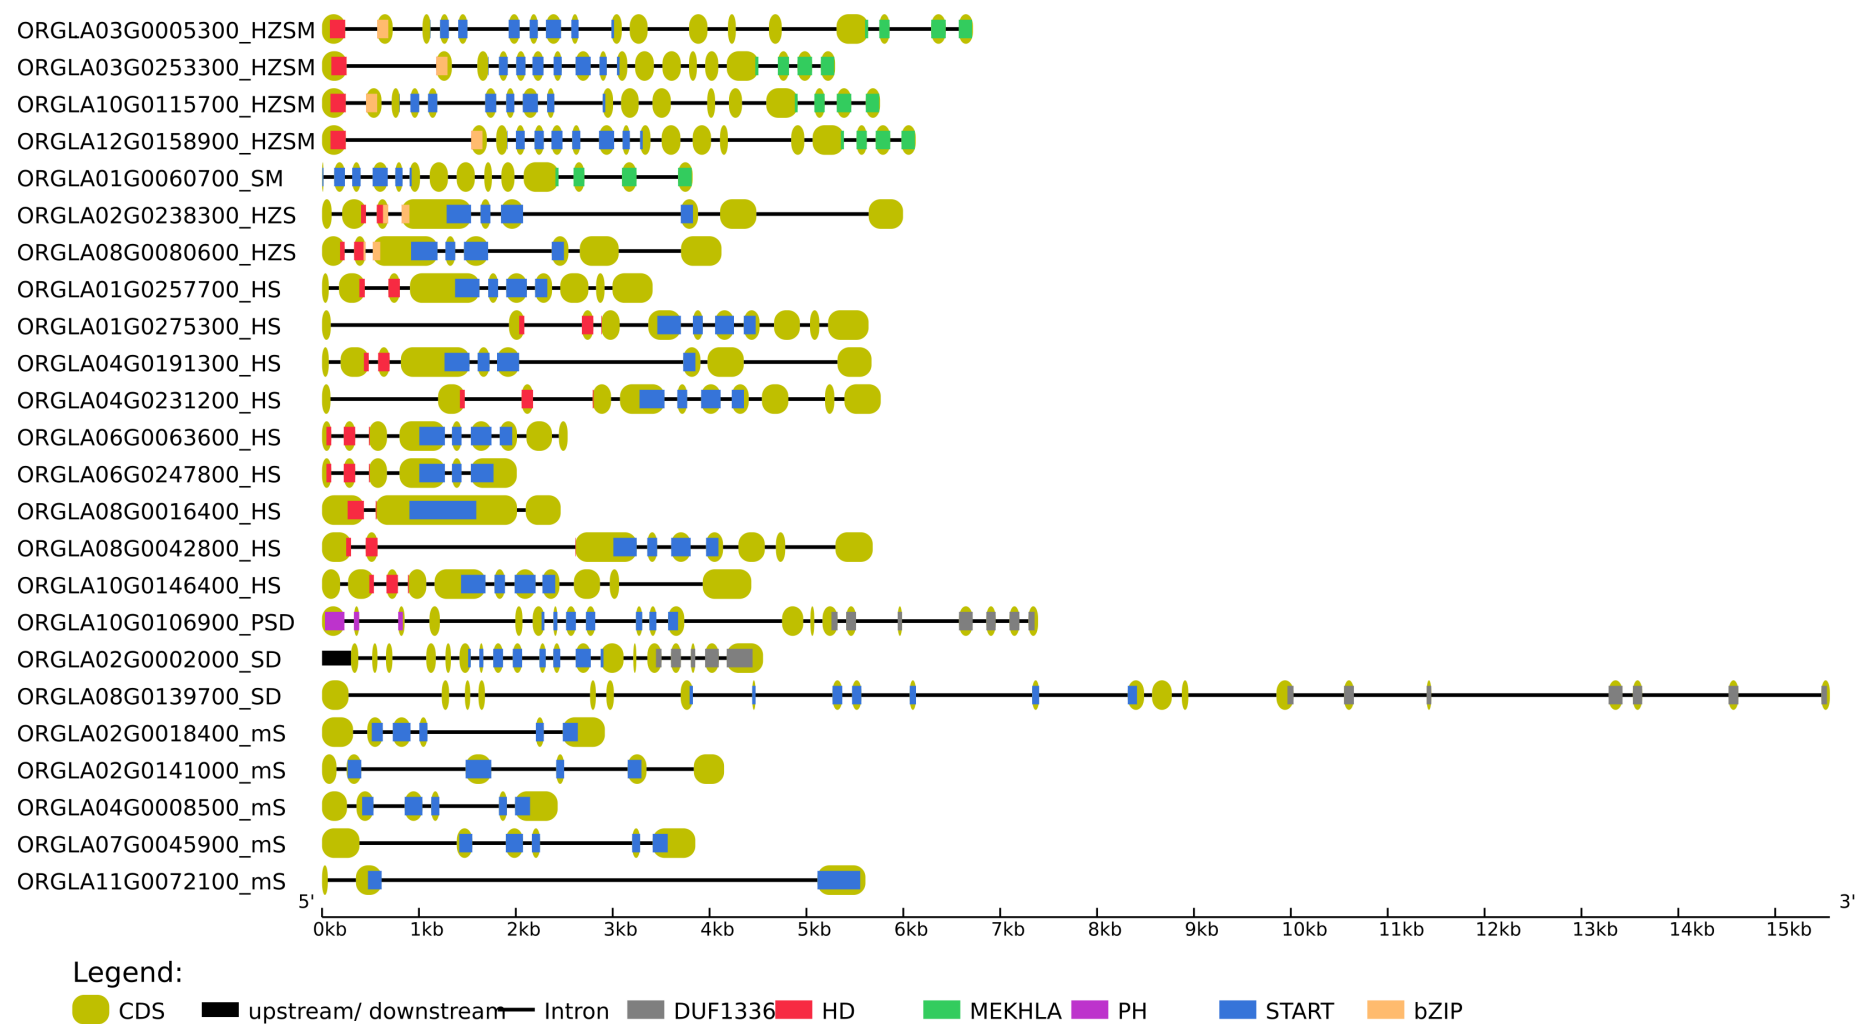

**Supplementary Figure 1C.** Gene structure analysis of the twenty-four STARTs in *Oryza glaberrima*: exon-intron patterns

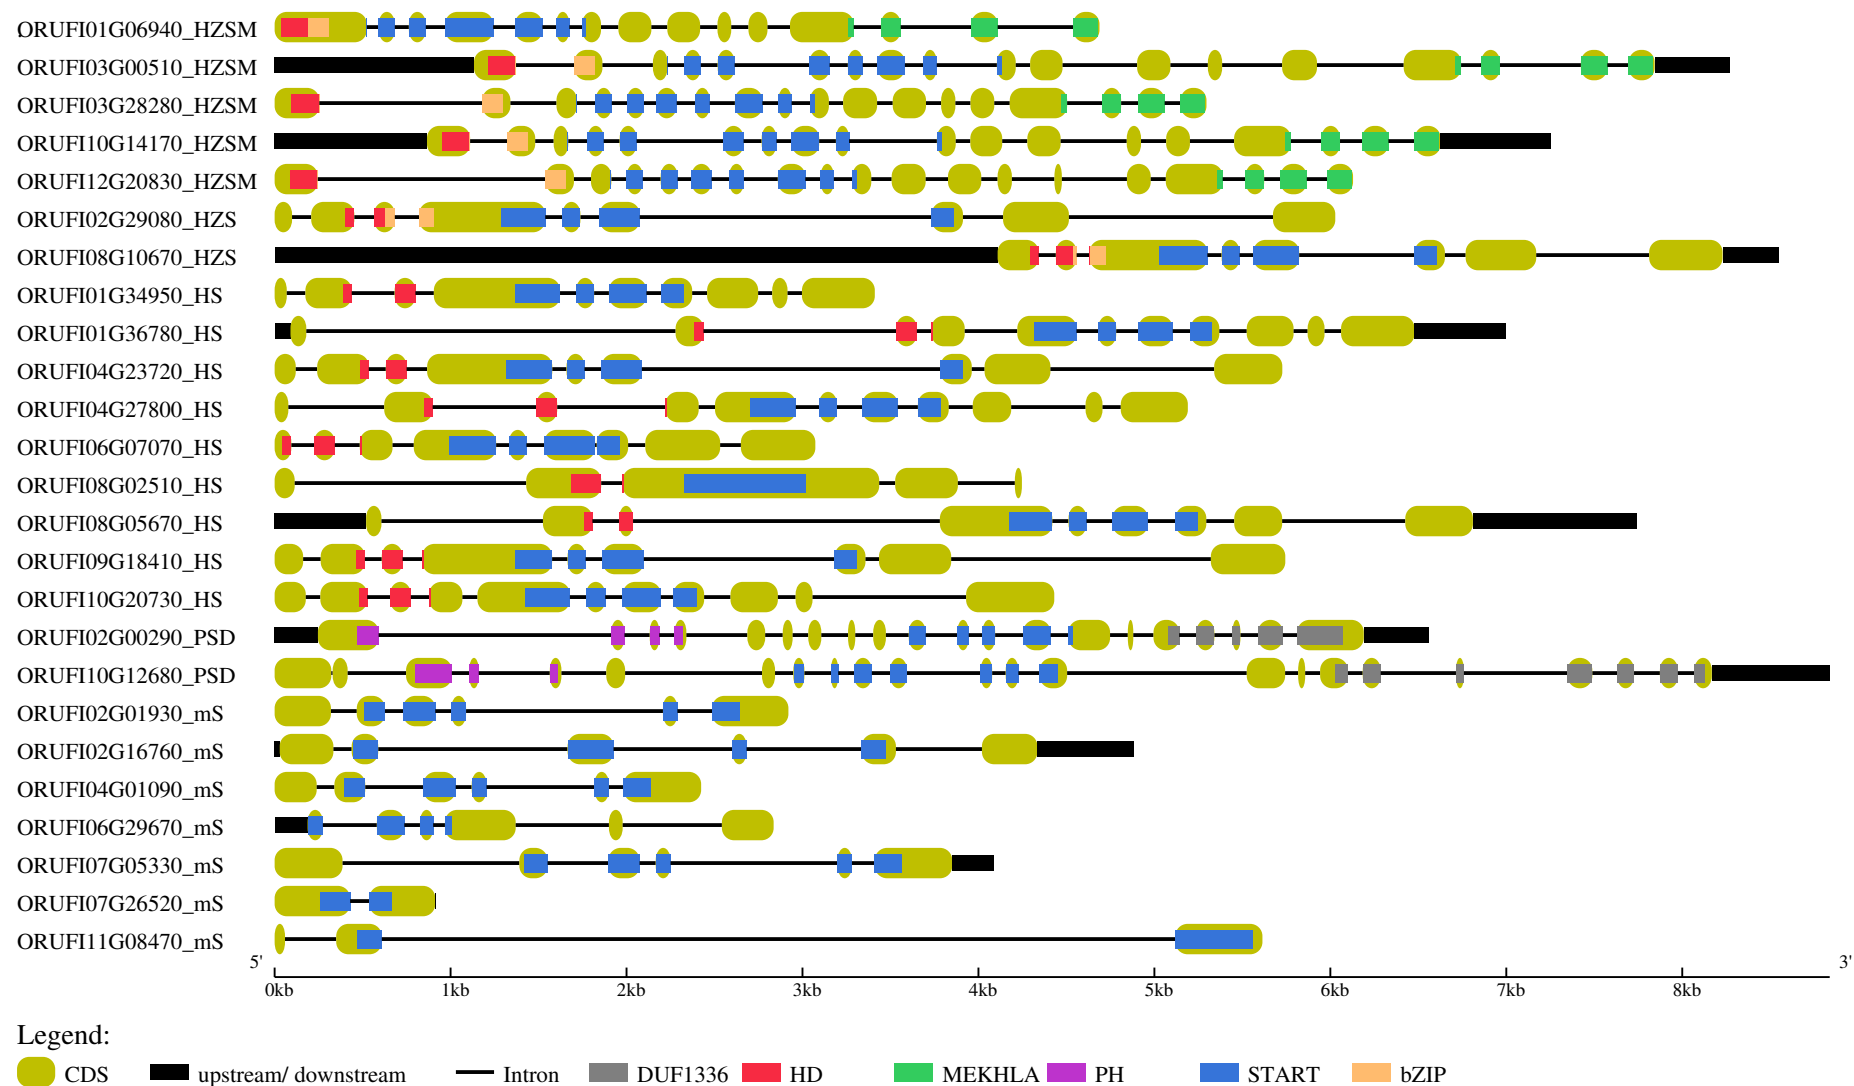

**Supplementary Figure 1D.** Gene structure analysis of the twenty-five STARTs in *Oryza rufipogon*: exon-intron patterns

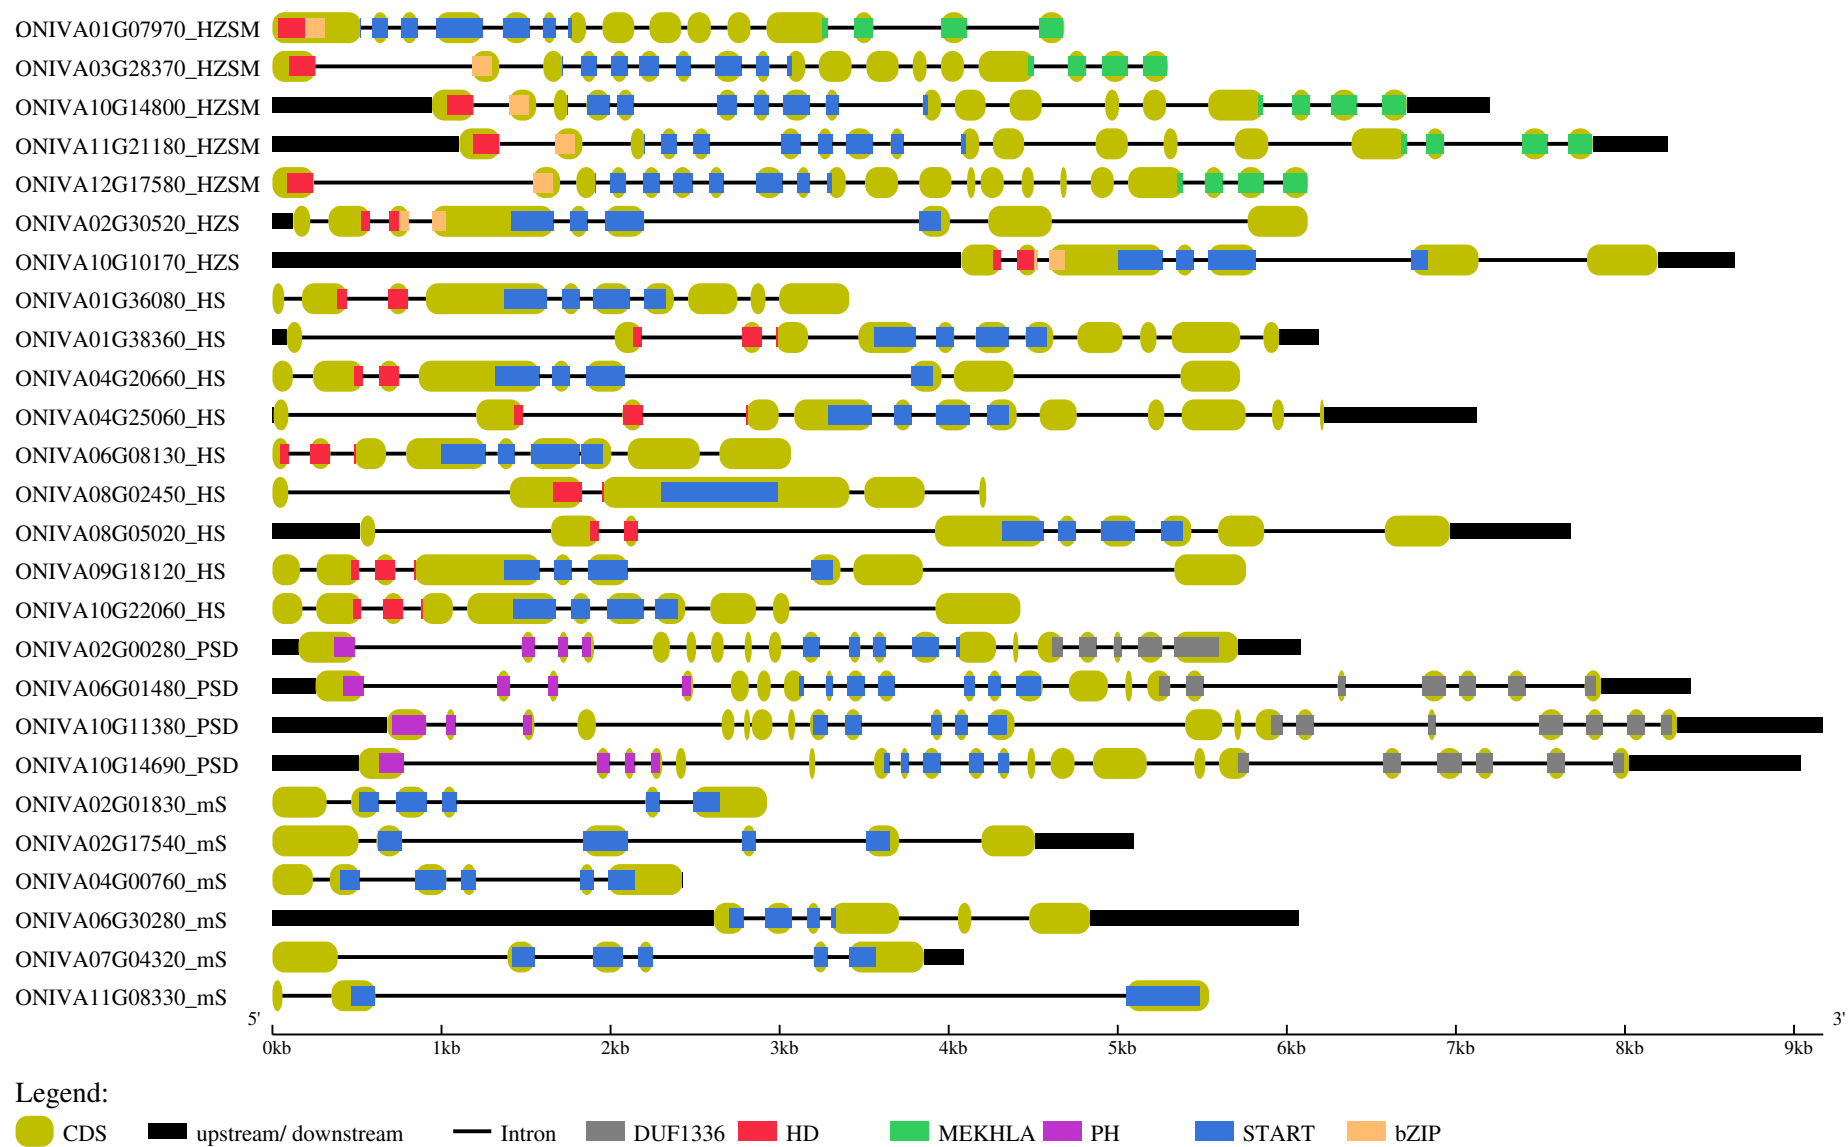

**Supplementary Figure 1E.** Gene structure analysis of the twenty-six STARTs in *Oryza nivara*: exon-intron patterns

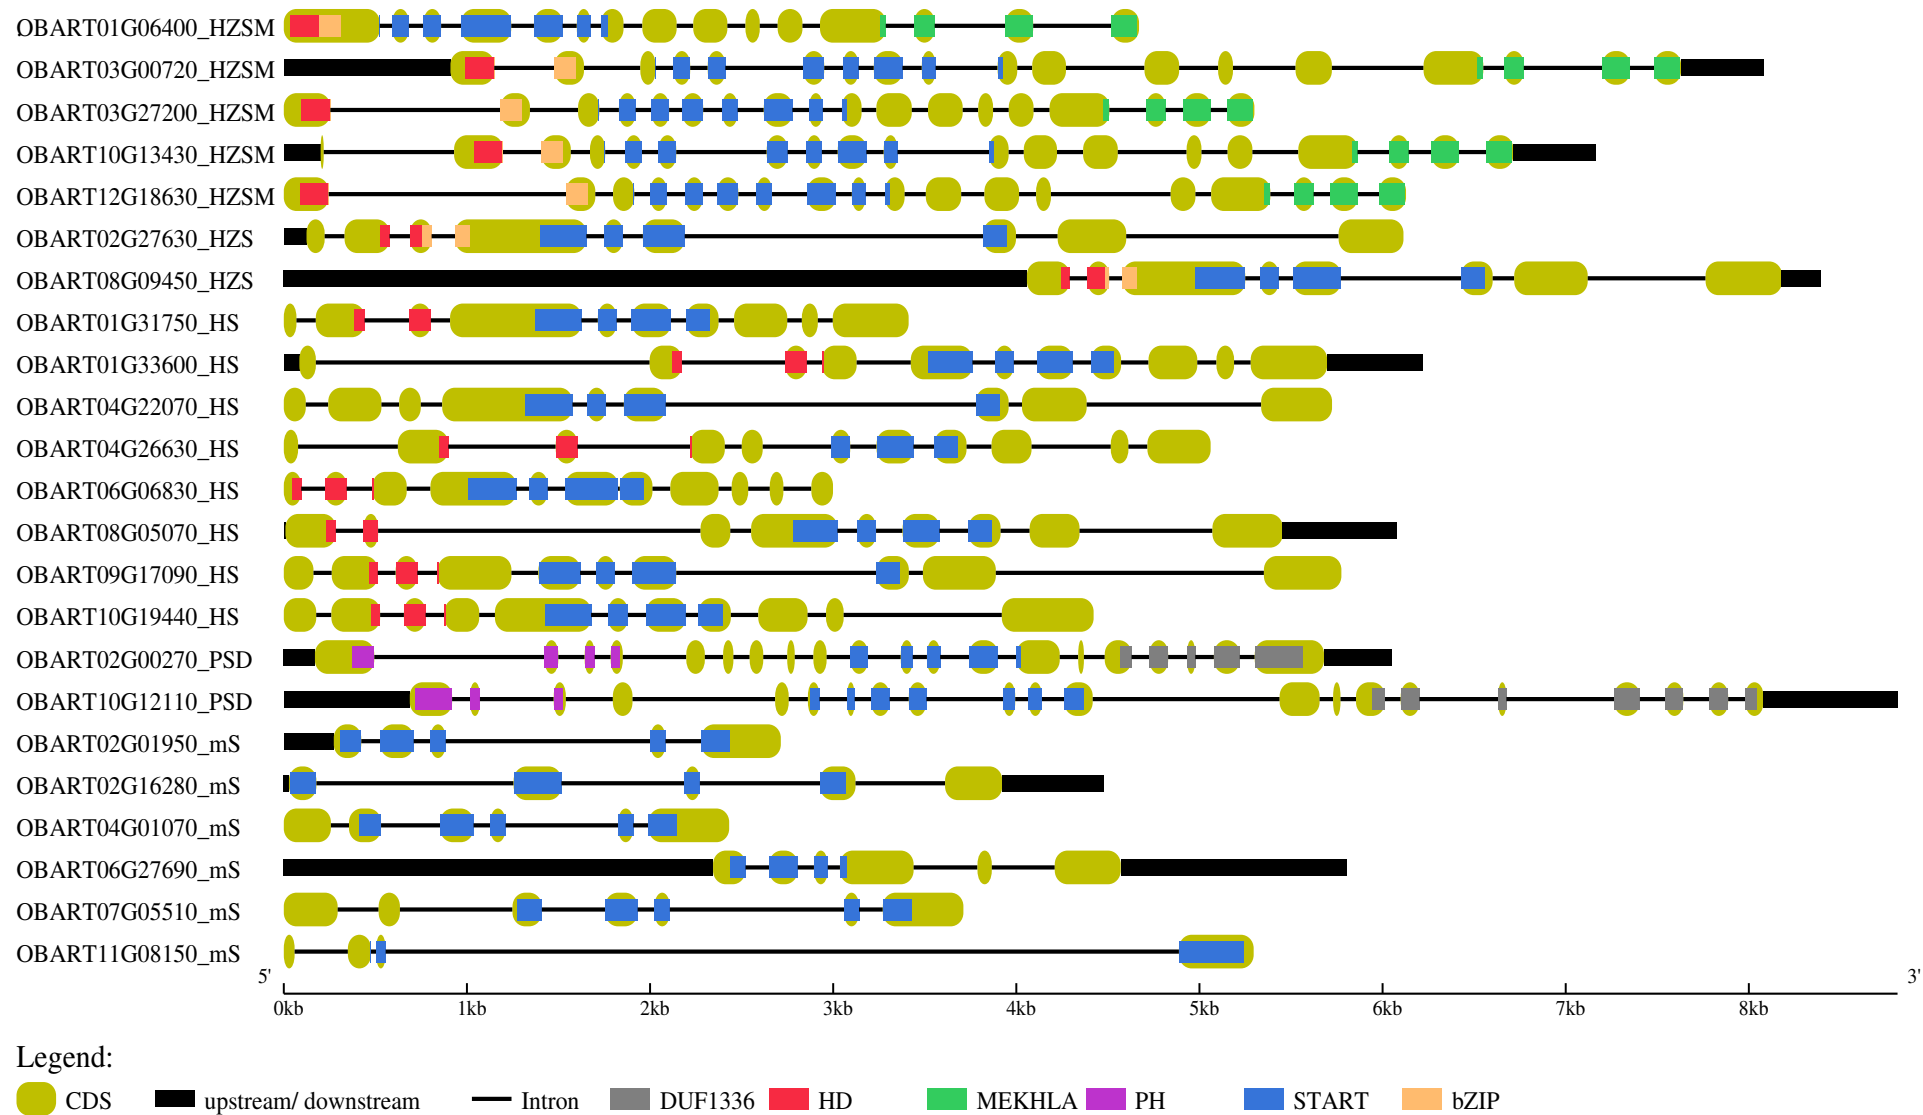

**Supplementary Figure 1F.** Gene structure analysis of the twenty-three STARTs in *Oryza barthii*: exon-intron patterns

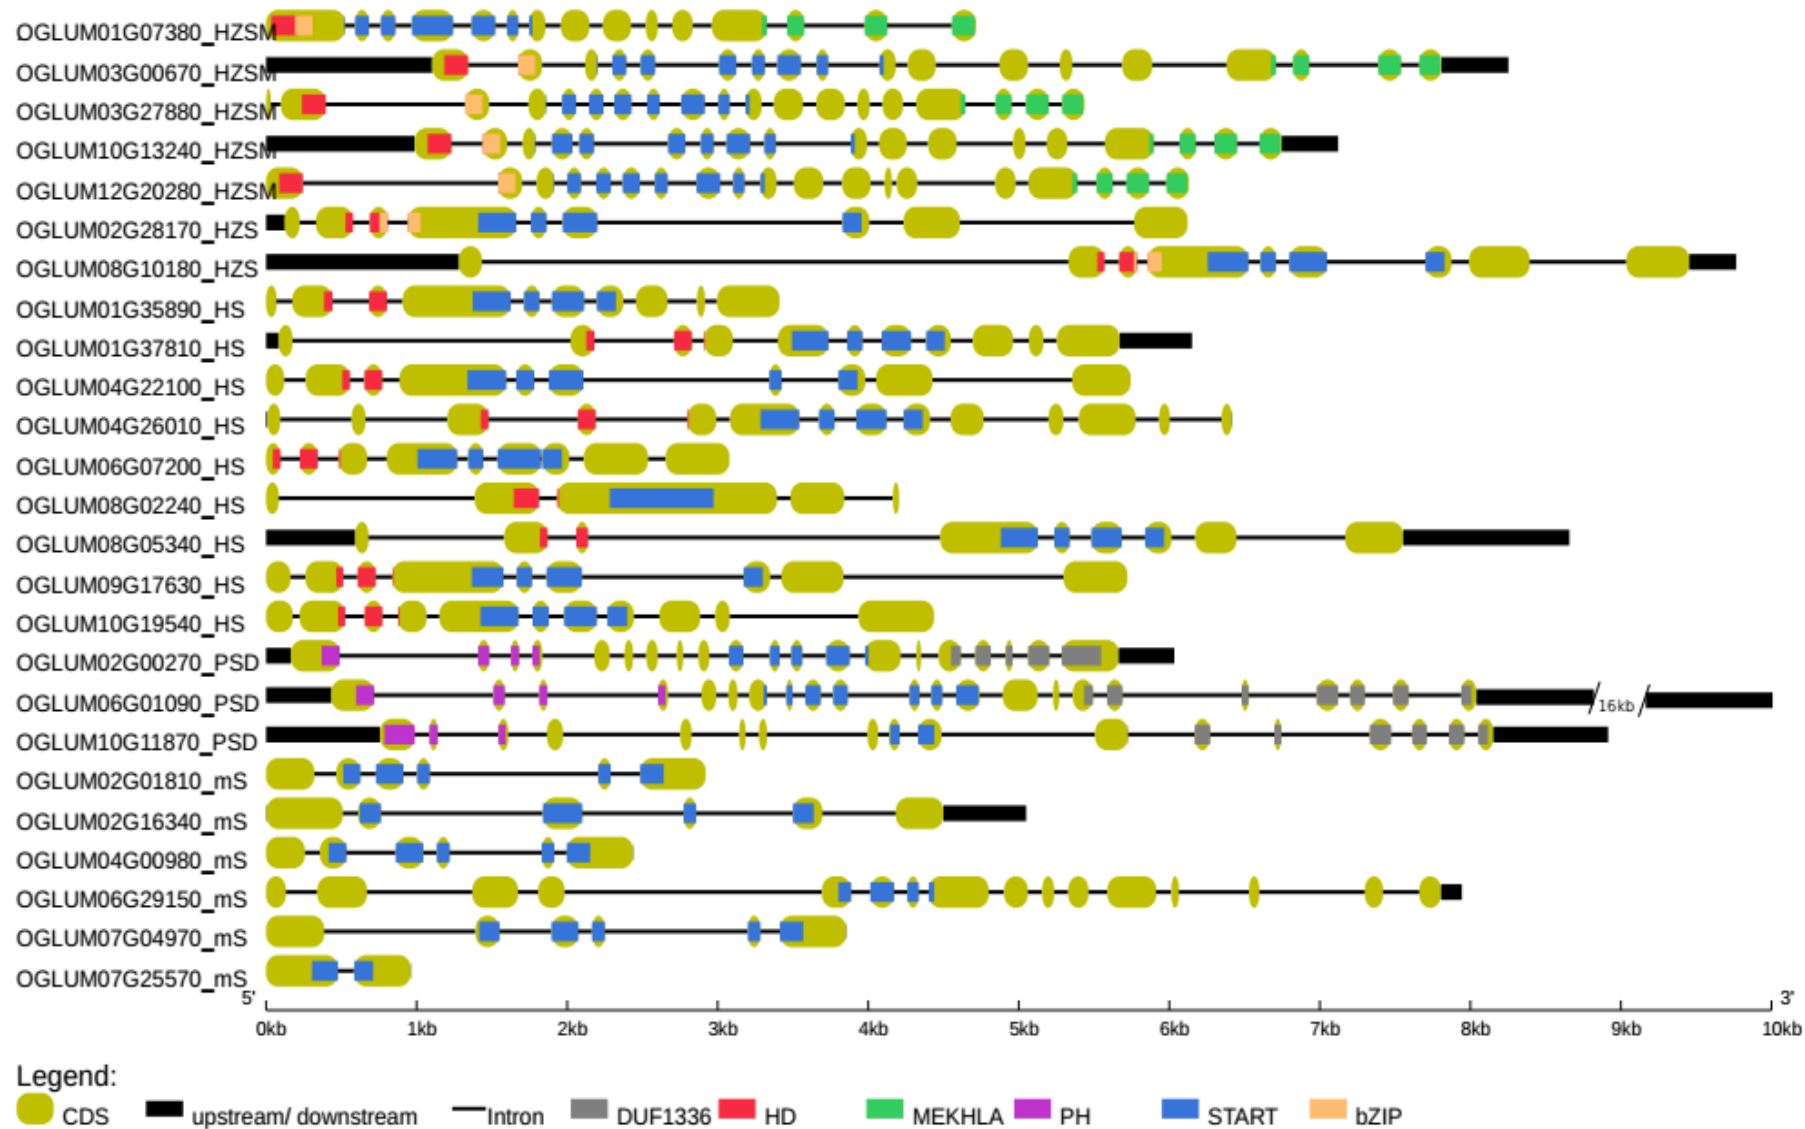

**Supplementary Figure 1G.** Gene structure analysis of the twenty-five STARTs in *Oryza glumipatula*: exon-intron patterns

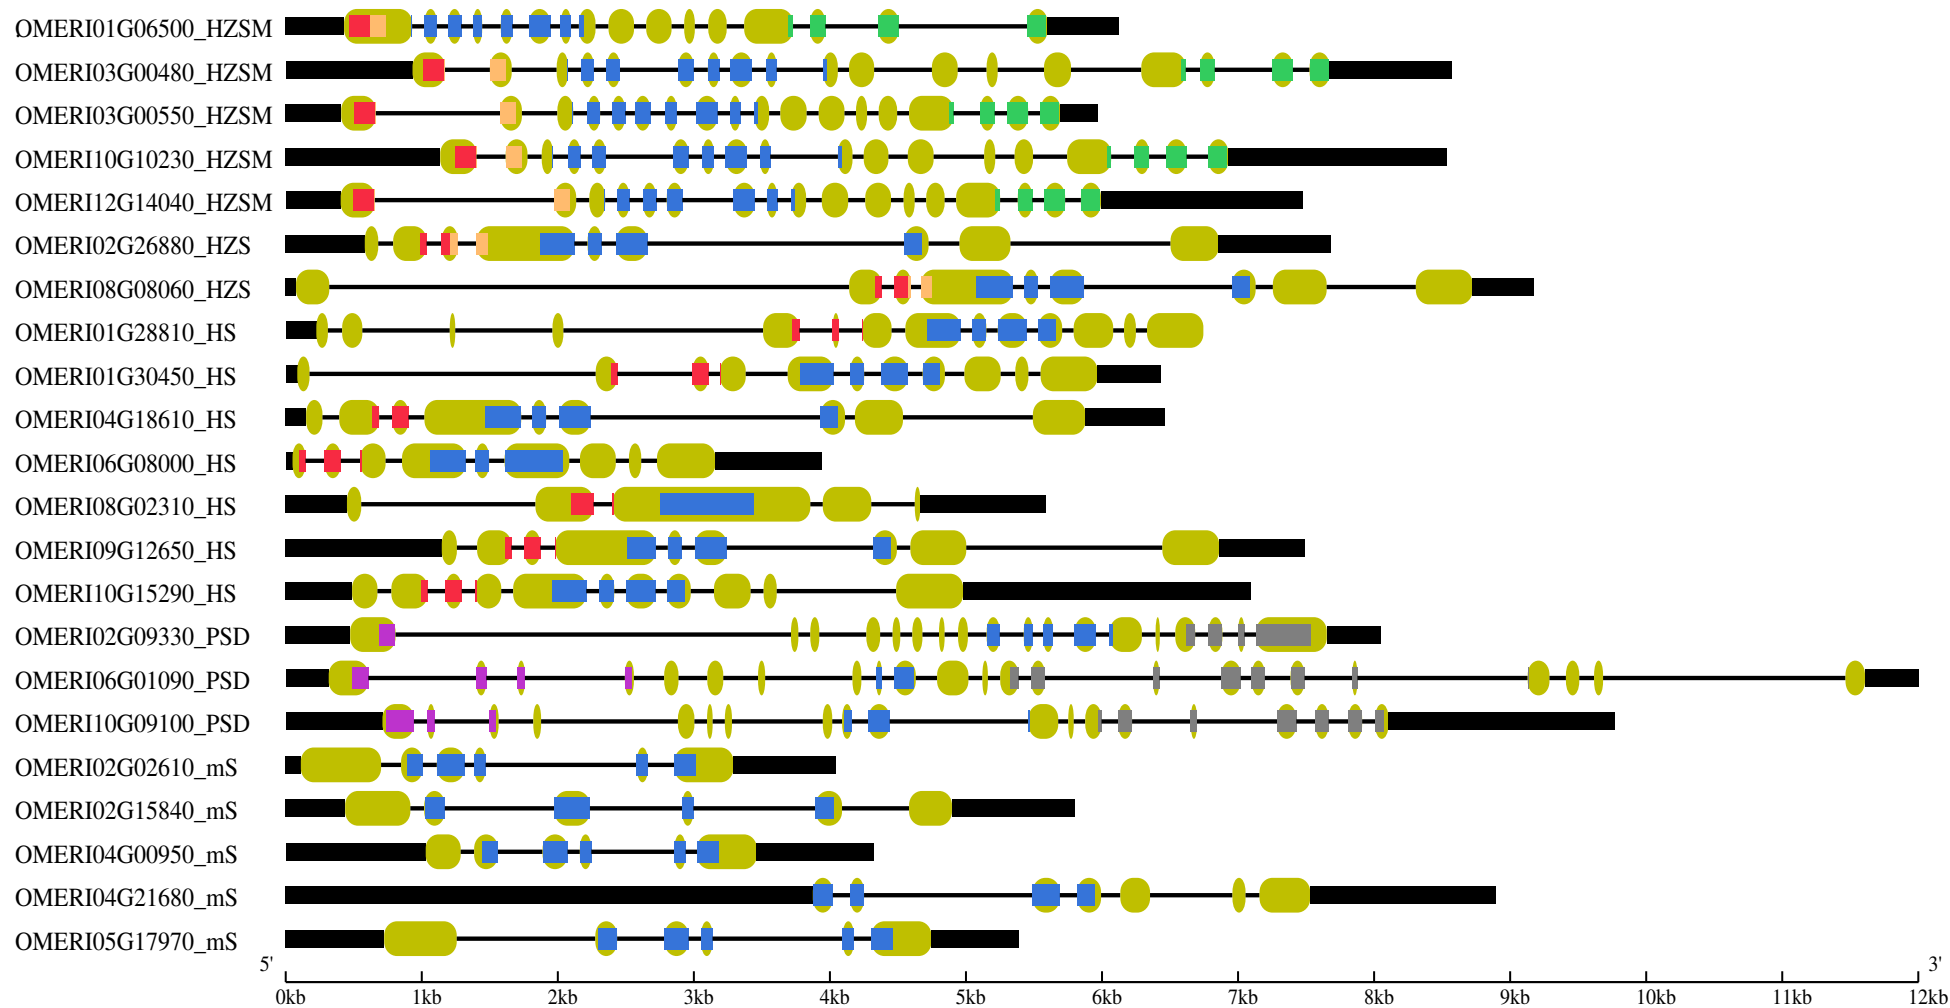

**Supplementary Figure 1H.** Gene structure analysis of the twenty-two STARTs in *Oryza meridionalis*: exon-intron patterns



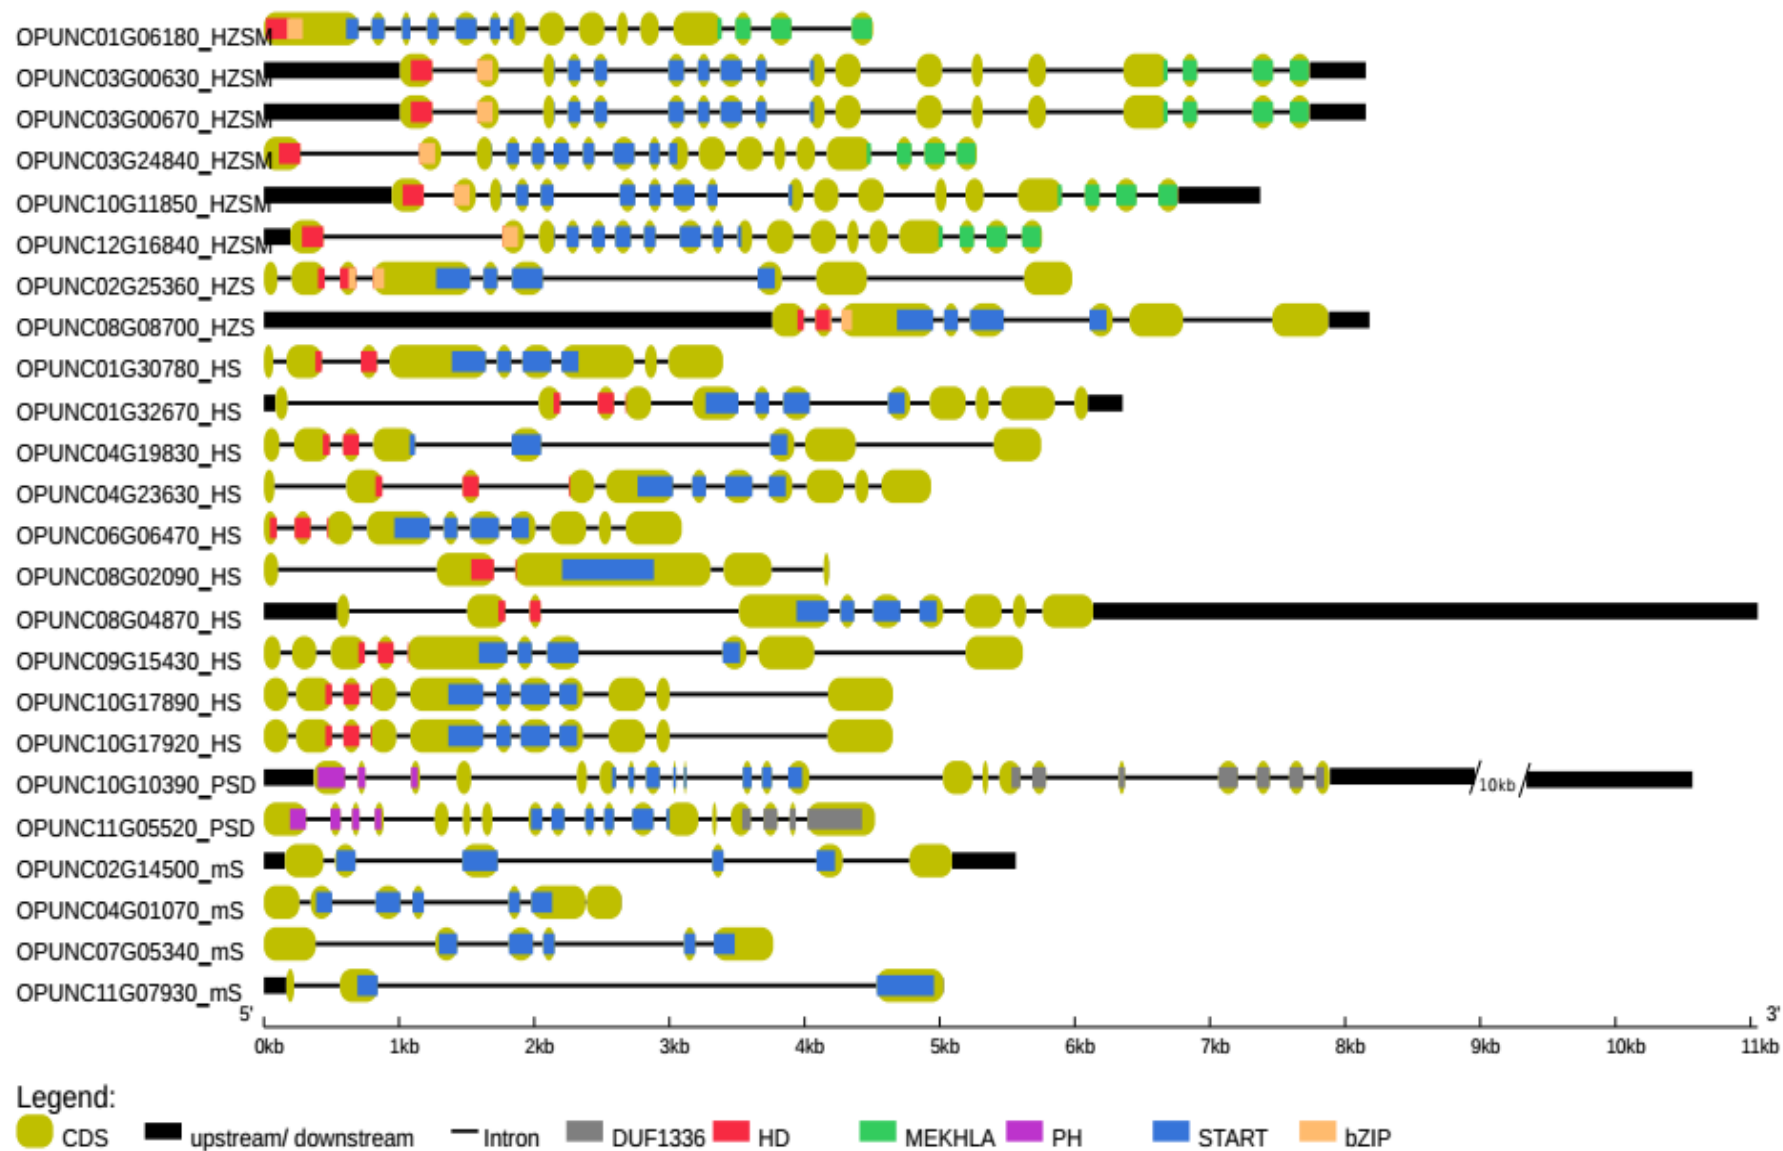

**Supplementary Figure 1I.** Gene structure analysis of the twenty-four STARTs in *Oryza punctata*: exon-intron patterns

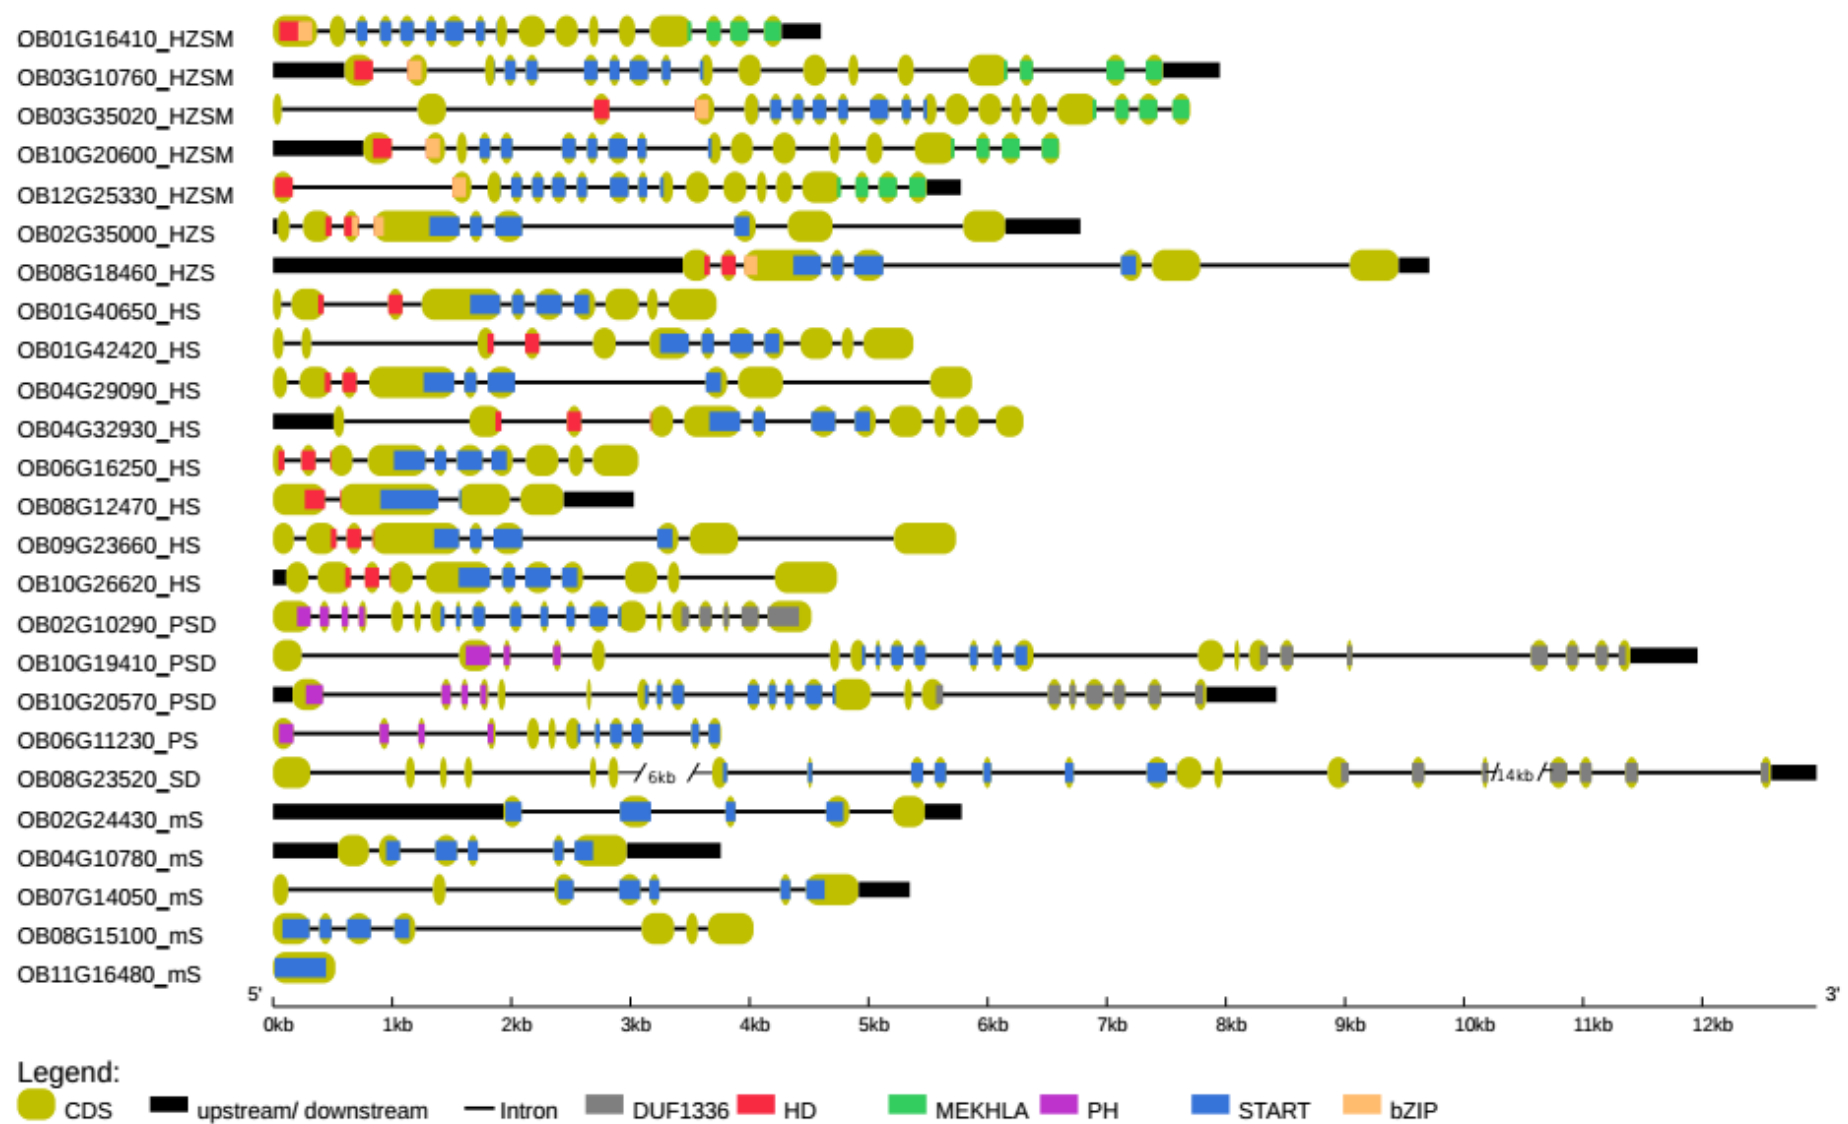

**Supplementary Figure 1J.** Gene structure analysis of the twenty-five STARTs in *Oryza brachyantha*: exon-intron patterns
